# Supplementary material for: Ctp1 and Yhm2: Two Mitochondrial Citrate Transporters to Support Metabolic Flexibility of Saccharomyces cerevisiae
Source: MDPI journal article supplement (doi:10.3390/ijms25031870), 2024-02-03
Supplement: s1 [file s1]

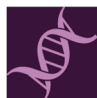

Figure S1

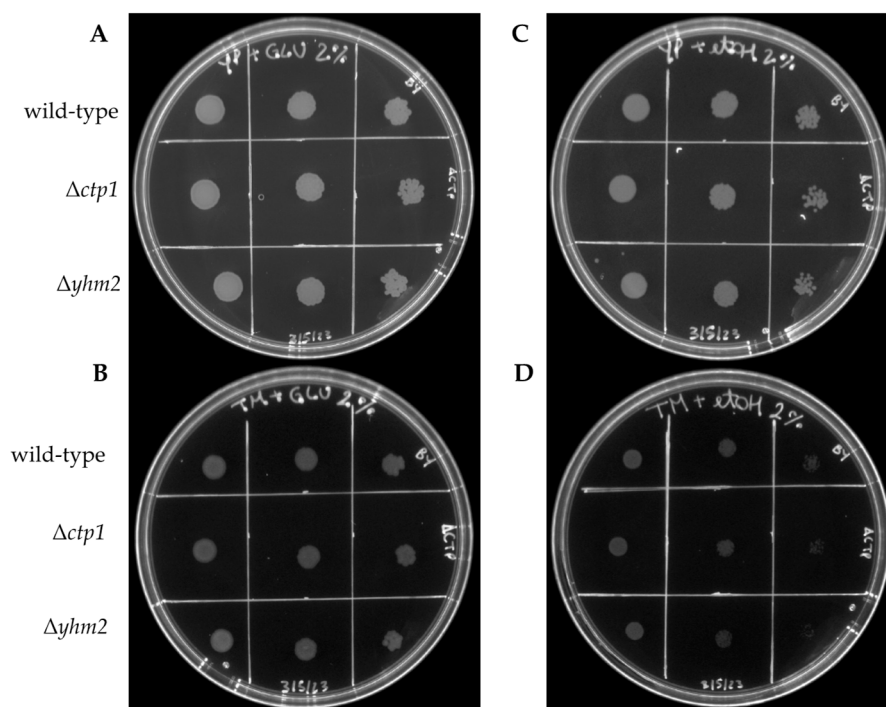

**Figure S1.** Growth behaviour of wild-type,  $\Delta ctp1$  and  $\Delta yhm2$  under various conditions. Three-fold serial dilutions of wild-type and deleted cells were plated on solid YP medium supplemented with glucose (A) or ethanol (C) and solid SM medium supplemented with glucose (B) or ethanol (D).
